1 **A glance at recombination hotspots in the domestic cat**

2

3 Hasan Alhaddad<sup>1</sup>, Chi Zhang<sup>2</sup>, Bruce Rannala<sup>3</sup>, and Leslie A. Lyons<sup>4</sup>

4 <sup>1</sup>College of Science, Department of Biological Sciences, Kuwait University,

5 Safat, Kuwait, 13060

6 <sup>2</sup>Department of Bioinformatics and Genetics, Swedish Museum of Natural

7 History, Box 50007, SE-104 05 Stockholm, Sweden

8 <sup>3</sup>Genome Center and Department of Evolution and Ecology, University of

9 California - Davis, Davis, CA 95616, USA

10 <sup>4</sup>Department of Veterinary Medicine and Surgery, College of Veterinary

11 Medicine, University of Missouri-Columbia, Columbia, MO, 65211

12

13 Corresponding author:

14 Hasan Alhaddad

15 Kuwait University

16 Safat, Kuwait, 13060

17 Email: [hassan.alhaddad@ku.edu.kw](mailto:hassan.alhaddad@ku.edu.kw)

18 [hhalhaddad@gmail.com](mailto:hhalhaddad@gmail.com)

19 Tel: +965 9770 1635

20 Running title: Recombination hotspots in cats

1 **Abstract**

2       Recombination has essential roles in increasing genetic variability within a  
3   population and in ensuring successful meiotic events. The objective of this study  
4   is to (i) infer the population scaled recombination rate ( $\rho$ ), and (ii) identify and  
5   characterize localities of increased recombination rate for the domestic cat, *Felis*  
6   *silvestris catus*. SNPs ( $n = 701$ ) were genotyped in twenty-two cats of Eastern  
7   random bred origin. The SNPs covered ten different chromosomal regions (A1,  
8   A2, B3, C2, D1, D2, D4, E2, F2, X) with an average region size of 850 Kb and an  
9   average SNP density of 70 SNPs/region. The Bayesian method in the program  
10   *inferRho* was used to infer regional population recombination rates and hotspots  
11   localities. The regions exhibited variable population recombination rates and four  
12   decisive recombination hotspots were identified on cat chromosome A2, D1, and  
13   E2 regions. No correlation was detected between the GC content and the locality  
14   of recombination spots. The hotspots enclosed L2 LINE elements and MIR and  
15   tRNA-Lys SINE elements in agreement with hotspots found in other mammals.

16  
17 **Keywords:** recombination, rho, recombination hotspot, domestic cat, *Felis*  
18 *silvestris catus*

# 1 **Introduction**

2           Recombination is a major source of genetic variation within sexually  
3 reproducing organisms, and is necessary for the proper alignment and segregation  
4 of homologous chromosomes during meiosis. Variation is achieved via  
5 recombination when new combinations of parental alleles across loci are  
6 generated and transmitted to succeeding generations. Lack of recombination may  
7 cause failure of meiotic division, or formation of gametes with chromosome  
8 number abnormalities (aneuploidy), which are often detrimental.

9           Localized chromosomal regions with elevated recombination rates are  
10 referred to as recombination “hotspots” (Steinmetz *et al*, 1982). Known hotspots  
11 in mice and human are generally 1 - 2 kb regions of high recombination rates  
12 surrounded by regions of low recombination (Paigen and Petkov, 2010). In  
13 humans, recombination hotspots are distributed about every 200 Kb (McVean *et*  
14 *al*, 2004) and over 25 000 hotspots have been identified (Myers *et al*, 2005). The  
15 first human recombination hotspot was identified using sperm typing via PCR in a  
16 region that harbors GC-rich mini-satellite (MS32) as a molecular signature  
17 (Jeffreys *et al*, 1998).

18           Several genomic features exhibit correlations with recombination hotspots.  
19 The GC content has been found to be positively correlated with recombination  
20 hotspots in humans (Myers *et al*, 2005), dog (Axelsson *et al*, 2012), pig  
21 (Tortereau *et al*, 2012), and chicken (Groenen *et al*, 2009) but not in mice (Wu *et*

1 *al*, 2010). Long terminal repeats (LTR), long interspersed elements (LINE), and  
2 short interspersed elements (SINE) were also observed to be positively correlated  
3 with the locality of recombination hot spots in human (Lee *et al*, 2011; Myers *et*  
4 *al*, 2005), mice (Wu *et al*, 2010) and pigs (Tortereau *et al*, 2012). DNA motifs  
5 (*cis*) have been identified to be associated with recombination hot spots both in  
6 humans (Myers *et al*, 2005; Myers *et al*, 2008; Zheng *et al*, 2010) and in other  
7 organisms (Comeron *et al*, 2012). In addition to the *cis* elements presented by the  
8 motifs, a *trans* element, PRDM9, was found to be a major determinant of  
9 recombination hotspots in human and mice (Baudat *et al*, 2010; Brunschwig *et al*,  
10 2012) but not in dog and related wild relatives (Auton *et al*, 2013; Munoz-Fuentes  
11 *et al*, 2011). PRDM9 is thought to bind to a DNA motif via a zinc finger domain,  
12 altering the chromatin structure through methylation, and recruiting  
13 recombination molecular machinery (Myers *et al*, 2010).

14 Coarse-scale recombination in cats has previously been investigated  
15 through linkage map analyses using sparsely distributed microsatellite markers  
16 (Menotti-Raymond *et al*, 1999; Menotti-Raymond *et al*, 2009). The objective of  
17 this study is to investigate fine-scale recombination rates, and recombination  
18 hotspots, in the domestic cat using population-level data for dense SNPs in ten  
19 selected genomic regions on ten different chromosomes.

## 20 **Materials and methods**

### 21 **Samples and genotypes**

1 SNP genotype data of twenty-two cats of Eastern random bred origin were  
2 obtained as previously described in (Alhaddad *et al*, 2013). The data were  
3 generated using a custom illumina GoldenGate array that represent ten different  
4 cat chromosomal regions (A1, A2, B3, C2, D1, D2, D4, E2, F2, X) and were  
5 composed of 1536 markers nearly equally distributed across the ten regions.  
6 Markers' positions were updated to their location in the 6.2 cat genome assembly  
7 (<http://genome.ucsc.edu/>). To ensure successful inference, three criteria were  
8 used to filter the SNPs: (i) SNPs mapped to a single chromosomal location on the  
9 most recent genome assembly of cat with 100% sequence match, (ii) SNPs  
10 exhibiting genotype rate of  $\geq 80\%$ , and (iii) SNPs possessing a minor allele  
11 frequency of  $\geq 0.1$ . The final dataset, included in this study, is composed of 701  
12 markers distributed over the ten regions. The genomic locations of the regions  
13 and related summaries are shown in Table 1 (see also Figure 1 and Supplementary  
14 Information 2).

15 Three SNPs residing in a recombination hotspot on chromosome E2  
16 region (see results) were chosen for genotype validation via sequencing. Primers  
17 were designed to flank the SNPs (Supplementary Information 2) and PCR was  
18 performed using DNA Engine Gradient Cyclers (MJ Research, GMI, Ramsey,  
19 MN) using the following conditions. For each reaction, 2 $\mu$ l of DNA was used in  
20 a 1.5mM magnesium concentration with 1 $\mu$ M primers in a total reaction volume  
21 of 20 $\mu$ l. The annealing temperature of all primers was 62°C. The PCR protocol

1 was as follows: initial denaturation at 94°C for 5 min followed by 40 cycles of  
2 94°Cx45 sec, 62°Cx20 sec, 72°Cx30 sec, and a final extension at 72°C for 20  
3 min. The PCR products were purified with ExoSap (USB, Cleveland, OH) per  
4 the manufacture's recommendations and directly sequenced using the BigDye  
5 terminator Sequencing Kit v3.1 (Applied Biosystems, Foster City, CA) as  
6 previously implemented (Bighignoli *et al*, 2007). Sequences were verified and  
7 aligned using the software sequencer version 4.10 (Gene Codes Corp., Ann  
8 Arbor, MI).

## 9 **Recombination inference**

10 The program *inferRho* uses the coalescent with recombination model  
11 (Hudson, 1991; Kingman, 1982a; Kingman, 1982b) in a full Bayesian framework  
12 to infer recombination rates and hot spots along the chromosome regions (Wang  
13 and Rannala, 2008; Wang and Rannala, 2009). The evolutionary relationship of  
14 the SNPs is represented by the ancestral recombination graph (ARG), which is an  
15 unobserved random variable that is integrated over using Markov Chain Monte  
16 Carlo (MCMC). In the variable recombination rate model, the crossing-over rate  
17 is  $\rho_i = 4N_e c_i$ , where  $N_e$  is the effective population size,  $c_i$  is the recombination rate  
18 per generation in cM/Mb between marker  $i$  and  $i + 1$  ( $i = 1, \dots, k - 1$ , and  $k$  is the  
19 total number of SNPs). The total recombination rate ( $c_i$ ) consists of the  
20 background crossing-over rate (following a prior gamma distribution) and

1 recombination hotspots (arising according to a Markov process) (Wang and  
2 Rannala, 2008; Wang and Rannala, 2009).

3 To make it computationally tractable, each chromosomal region was  
4 divided into blocks, with 20 SNPs per block (e.g., chromosome A1 region with 53  
5 SNPs was divided into 3 blocks, 20 SNPs in the first and second block and 13  
6 SNPs in the third block). Blocks from each chromosomal region are assumed to  
7 share the same population size parameter ( $\theta$ ) but have an independent ARG for  
8 each block. Preliminary runs were executed to determine the appropriate length  
9 and thinning interval of the MCMC chain for each chromosomal dataset. The last  
10 half of the MCMC samples (1000 samples) was used to estimate the  
11 recombination rates ( $\rho_i$ ) and to plot them with respect to the SNP marker  
12 positions. The distance-weighted mean recombination rate for each chromosomal  
13 region was calculated using the following equation:

$$14 \quad \bar{\rho} = \sum_{i=1}^{k-1} \rho_i d_i / \sum_{i=1}^{k-1} d_i,$$

15 in which  $d_i$  is the distance between marker  $i$  and  $i+1$ , and  $k$  is the total number of  
16 markers in the region.

# 17 **Designation of recombination hot spots**

18 We calculated the Bayes factors (Kass and Raftery, 1995) to locate the  
19 positions of hotspots and represent relative odds of a hotspot being present. Each  
20 chromosomal region was divided into bins (200 bp per bin) for analysis of

1 posterior samples to estimate the probability of having hotspot ( $p_j$ ) for each bin.  
 2 The corresponding probability of hotspot for each bin ( $q_j$ ) from the prior was  
 3 obtained by running the program without data (e.g., constant likelihood) but  
 4 maintaining the same sample size and marker positions. The Bayes factor ( $BF$ ) is  
 5 defined as the ratio of the posterior and prior odds:

$$6 \quad BF = \frac{p_j / (1 - p_j)}{q_j / (1 - q_j)}.$$

7 The total number of bins depends on the length of the region, thus the  
 8 range of  $j$  is variable among the ten chromosome regions. Recombination  
 9 hotspots are defined to have at least two consecutive bins with  $BF \geq 100$  (cf.  
 10 section 3.2 in Kass&Raftery (1995)).

## 11 **GC content and genomic elements analyses**

12 The GC content was calculated for the sequences of each bin using the  
 13 function *CG.content* of package *APE* in R (Paradis *et al*, 2004).

14 Variation and repeat elements within each of the ten chromosomal regions  
 15 were downloaded from UCSC genome browser using *RepeatMasker* for the v6.2  
 16 cat genome assembly. Elements were analyzed separately for bins with  $BF < 100$   
 17 and  $BF \geq 100$  (hotspot bins). The elements within neutral bins ( $BF < 100$ ) were  
 18 to provide the general overview of the elements within each chromosomal region.

## 19 **Results**

### 20 **Samples and genotypes**



1           The dataset is composed of 701 SNPs on ten different cat chromosomal  
2 regions with an average of 70 SNPs/region. The chromosome E2 region harbors  
3 the highest number of SNPs ( $n = 90$ ) while chromosome X region has the lowest  
4 ( $n = 37$ ). SNPs are distributed across the regions with an average distance  
5 between SNPs of 12 Kb and a range of 145 bp – 651 Kb (Table 1). Four SNPs  
6 were selected for genotype verification using direct sequencing. The sequencing  
7 results showed were concordant to the genotypes obtained previously using the  
8 genotyping platform.

## 9   **Recombination rates and hotspots**

10           The ten regions on chromosomes: A1, A2, B3, C2, D1, D2, D4, E2, F2,  
11 and X, were analyzed using *inferRho*. The lengths of the MCMC chains were  
12 determined as: 600 000 iterations for A1, C2; 800 000 iterations for A2, D1, D4,  
13 F2; 1 000 000 iterations for B3, D2, E2; and 500 000 iterations for X. Two  
14 thousand posterior samples for each chromosomal dataset were obtained after  
15 thinning, while the first half were discarded as burn-in. Using a parallel  
16 computing approach, each run could be accomplished within one to two weeks on  
17 a cluster with 2 Opteron 270 (2.0 GHz) processors per node.

18           Population recombination rate ( $\rho$ ) is plotted for each region (Figure 1 a-c,  
19 Supplementary Information 2a). The mean recombination rate ( $\rho$ ) across all  
20 regions is 200 per Mb. The E2 region exhibits the highest mean rate (309 /Mb)  
21 whereas X region has the lowest (77 /Mb) (Table 1). The difference between the

1 background recombination rate and whole recombination rate is indicative of  
2 recombination spots. This difference is most noticeable in regions of  
3 chromosomes A2, D1, and E2 (Figure 1 a-c).

4 The posterior probability of hotspot was calculated for bins of size 200 bp  
5 in each region (Figure 1 d-f, Supplementary Information 2b). Chromosomes A2,  
6 D1, and E2 show distinctly high posterior probabilities ( $> 0.6$ ) in four localized  
7 areas (Figure 1 d-f). The posterior probabilities for the other seven chromosome  
8 regions (A1, B3, C2, D2, D4, F2, and X) are less than 0.2, indicating little support  
9 for elevation of recombination rate in these areas.

10 The Bayes factors (Figure 1 g-i, Supplementary Information 2c) are  
11 consistent in pattern with the posterior probabilities (Figure 1 d-f, Supplementary  
12 Information 2b) and recombination rates (Figure 1 a-c, Supplementary  
13 Information 2a). Approximately 99% ( $n = 42,531$ ) of bins were classified as  
14 “neutral” ( $BF < 100$ ) across all regions examined. The hot spots were found in  
15 only three chromosomal regions (A2, D1, and E2) and represented  $\sim 0.13\%$  ( $n =$   
16 57) of all bins studied. Summaries of the numbers and distribution of bins within  
17 each chromosomal region are provided in Table 1. The hotspots had size of 3 Kb  
18 in A2, 1.8 Kb in D1, and 1.8 Kb for the first and 4.6 Kb for the second in E2. The  
19 distance between the two hotspots in E2 was  $\sim 37.4$  Kb (Table 2).

## 20 **GC content analysis**

1           The  $\log_{10}$  of the Bayes factor was plotted as a function of the GC content  
2   in Supplementary Information 3. Pearson's correlation test revealed a positive  
3   correlation between GC and  $\log_{10}$ (Bayes factor) ( $\text{cor} = 0.077$ ,  $p < 0.0001$ ) but was  
4   not suggestive of strong correlation. Moreover, no significant differences in the  
5   mean GC content of each class of bins were observed (t-test,  $p = 0.05$ )  
6   (Supplementary Information 3). The mean GC contents of the hotspots are shown  
7   in Table 2.

### 8   **Repeat elements analysis**

9           The four hotspot regions contained 22 repeat and variation elements  
10   (Table 2, Figure 2a). SINE elements constitute the highest proportion (40%) of  
11   the elements present in the hotspots followed by LINE elements (27%). Within  
12   LINE elements, L2 elements were present in three of the four hotspot regions.  
13   MIR family elements were present in all hotspot regions and tRNA-Lys family  
14   elements are present in three of the four elements. Low complexity, long terminal  
15   repeats, simple repeats, and DNA elements were inconsistently present across the  
16   hotspot regions.

17           Variation and repeat elements within neutral regions were investigated to  
18   get a general view of the general distribution of repeat elements (Figure 2b). In  
19   neutral regions, the SINE elements represent the highest proportion of elements,  
20   34 %. The tRNA-Lys SINE elements constitute 22% and MIR SINE elements  
21   represent 12%. The second highest repeat elements was the LINE elements, 29%,

1 where L1 elements represent ~17% and L2 elements represent 9.5% of all  
2 elements in the neutral regions.

### 3 **Discussion**

4 Advances in population genetic theory and technology have made it  
5 possible to estimate recombination rates directly from genotype data on  
6 population samples, overcoming the limitations of sperm typing or using large  
7 extended families (Hellenthal and Stephens, 2006). The strategy of the  
8 population genetics based approach is to use information on the number of  
9 recombination events that have occurred in the history of the population, which  
10 can be detected by modeling the patterns of genetic variation expected to be  
11 present in randomly selected individuals.

12 The model accounts for coalescent and recombination events in an  
13 Ancestral Recombination Graph (ARG). Markers will have coalescent trees that  
14 are likely to vary across the genome. In theory, all markers in a chromosome are  
15 correlated by an ARG. However, the size of the ARG might grow much faster  
16 than linear with the increasing number of SNPs, making it computational  
17 intractable. In practice, the data are usually partitioned into blocks. Blocks from  
18 the same chromosomal region are assumed to share the same population size  
19 parameter ( $\theta$ ) but have an independent ARG for each block. For fast  
20 computation, some methods use an approximate likelihood instead of the full  
21 likelihood calculation, for example, the composite-likelihood method

1 implemented in *LDhat* (McVean *et al*, 2002) and PAC-likelihood method  
 2 implemented in *PHASE* (Stephens and Donnelly, 2003). Approximate-likelihood  
 3 methods may be feasible to apply to large genomic regions, but may lack power  
 4 to detect a moderate or low rate of recombination. Full-likelihood method in  
 5 *inferRho* uses all of the information in the data and should therefore provide more  
 6 accurate estimates (Wang and Rannala, 2008; Wang and Rannala, 2009).

7       The analysis of recombination hotspots in cats, presented here, constitutes  
 8 the first application of the program *inferRho* to non-human data and the first  
 9 analysis of fine-scale recombination rates in cats. The population recombination  
 10 rate was found to be variable between the regions analyzed and, as expected, the  
 11 mean recombination rate of X chromosome regions was lower than that of any  
 12 autosomal regions. This variation in recombination rates and the notable reduced  
 13 rate outside of the pseudoautosomal region of the X chromosome are in  
 14 agreement with observations of recombination in human (Myers *et al*, 2005) and  
 15 dog (Axelsson *et al*, 2012). The latter result is expected due to that fact that  
 16 recombination outside of the pseudoautosomal region occurs only in females.

17       Four decisive hot spots were identified on three chromosomes: A2, D1 and  
 18 E2. The localities of the hotspots are in agreement with the localities of increased  
 19 posterior probabilities and the general topography of recombination rates as  
 20 expected. Acknowledging the limitation posed by the total size of the regions  
 21 analyzed (total ~ 8.5 Mb) compared to the size of the genome and the lack of

1 power to perform correlation and element enrichment analyses, the following  
2 observations have been made: (i) Unlike hotspots in humans (Myers *et al*, 2005),  
3 dog (Axelsson *et al*, 2012), pig (Tortereau *et al*, 2012), and chicken (Groenen *et*  
4 *al*, 2009), which exhibit positive correlation with GC content, the hotspots in cats,  
5 identified in this study, show no distinct positive correlation with GC content (this  
6 is similar to mice) (Wu *et al*, 2010). (ii) Genomic features in the four hot spots  
7 are consistent with those found in other mammals. Three of the decisive hotspots  
8 contained at least one L2 LINE element, which is consistent with features of  
9 hotspots in human and chimpanzee (Lee *et al*, 2011; Myers *et al*, 2010; Myers *et*  
10 *al*, 2008). Similarly, MIR and tRNA-Lys SINE elements were found in hotspots  
11 of cats, which is consistent with the positive correlation found for hotspots in  
12 human (Lee *et al*, 2011), and pig (Tortereau *et al*, 2012). (iii) The general  
13 similarity of the hotspot repeat elements to those of other mammals suggests  
14 similar recombination mechanism and probable involvement of PRDM9. (iv)  
15 This similarity suggests there may be evolutionary differences between cats and  
16 dogs, especially since recent studies found that PRDM is not functional in dog  
17 (Axelsson *et al*, 2012; Munoz-Fuentes *et al*, 2011) and that recombination  
18 hotspots in dogs are associated with CpG and promoter regions (Auton *et al*,  
19 2013).

20 This study represents a glimpse of recombination hotspots in cats and only  
21 an initial step toward understanding recombination in cats. As cat resources

1 developing, genome-wide analyses may be performed and more definitive  
2 conclusions will reach. Nonetheless, understanding the recombination landscape  
3 will shed light on the mechanism of recombination in cats compared to other  
4 species, the pattern of variation generated by recombination in cats, and should  
5 lead to better implementation of efficient disease mapping strategies in cats.

## 6 **Acknowledgments**

7  
8 We would like to thank Drs. Jeffery Ross-Ibarra, Robert A. Grahn, and  
9 Barbara Gandolfi for their comments and suggestions. This project has been  
10 funded in part previously by the National Center for Research Resources R24  
11 RR016094 and is currently supported by the Office of Research Infrastructure  
12 Programs OD R24OD010928, the Winn Feline Foundation (W10-014, W11-041),  
13 the George and Phyllis Miller Feline Health Fund, and the Center for Companion  
14 Animal Health, School of Veterinary Medicine, University of California, Davis.  
15 HA is funded with a full scholarship by Kuwait University.

1 **Reference**

2

3 Alhaddad H, Khan R, Grahn RA, Gandolfi B, Mullikin JC, Cole SA *et al* (2013).

4 Extent of linkage disequilibrium in the domestic cat, *Felis silvestris catus*, and its  
5 breeds. *Plos One* **8**(1): e53537.

6

7 Auton A, Rui Li Y, Kidd J, Oliveira K, Nadel J, Holloway JK *et al* (2013).

8 Genetic recombination is targeted towards gene promoter regions in dogs. *ArXiv*  
9 *e-prints* **arXiv:1305.6485**.

10

11 Axelsson E, Webster MT, Ratnakumar A, Ponting CP, Lindblad-Toh K (2012).

12 Death of PRDM9 coincides with stabilization of the recombination landscape in  
13 the dog genome. *Genome Res* **22**(1): 51-63.

14

15 Baudat F, Buard J, Grey C, Fledel-Alon A, Ober C, Przeworski M *et al* (2010).

16 PRDM9 is a major determinant of meiotic recombination hotspots in humans and  
17 mice. *Science* **327**(5967): 836-840.

18

19 Bighignoli B, Niini T, Grahn RA, Pedersen NC, Millon LV, Polli M *et al* (2007).

20 Cytidine monophospho-N-acetylneuraminic acid hydroxylase (CMAH) mutations  
21 associated with the domestic cat AB blood group. *BMC Genet* **8**: 27.

22



1    Brunschwig H, Levi L, Ben-David E, Williams RW, Yakir B, Shifman S (2012).  
2    Fine-scale Map of Recombination Rates and Hotspots in the Mouse Genome.  
3    *Genetics* **112.141036**  
4  
5    Comeron JM, Ratnappan R, Bailin S (2012). The many landscapes of  
6    recombination in *Drosophila melanogaster*. *PLoS Genet* **8**(10): e1002905.  
7  
8    Groenen MA, Wahlberg P, Foglio M, Cheng HH, Megens HJ, Crooijmans RP *et*  
9    *al* (2009). A high-density SNP-based linkage map of the chicken genome reveals  
10   sequence features correlated with recombination rate. *Genome Res* **19**(3): 510-  
11   519.  
12  
13   Hellenthal G, Stephens M (2006). Insights into recombination from population  
14   genetic variation. *Curr Opin Genet Dev* **16**(6): 565-572.  
15  
16   Hudson RR (1991). Gene genealogies and the coalescent process. *Oxford Survey*  
17   *in Evolutionary Biology* **7**: 1-44.  
18  
19   Jeffreys AJ, Murray J, Neumann R (1998). High-resolution mapping of  
20   crossovers in human sperm defines a minisatellite-associated recombination  
21   hotspot. *Mol Cell* **2**(2): 267-273.

1

2 Kass RE, Raftery AE (1995). Bayes Factors. *Journal of the American Statistical*

3 *Association* **90**(430): 773-795.

4

5 Kingman JFC (1982a). The coalescent. *Stochastic Processes and their*

6 *Applications* **13**(3): 235-248.

7

8 Kingman JFC (1982b). On the Genealogy of Large Populations. *Journal of*

9 *Applied Probability* **19**: 27-43.

10

11 Lee YS, Chao A, Chen CH, Chou T, Wang SY, Wang TH (2011). Analysis of

12 human meiotic recombination events with a parent-sibling tracing approach. *BMC*

13 *Genomics* **12**: 434.

14

15 McVean G, Awadalla P, Fearnhead P (2002). A coalescent-based method for

16 detecting and estimating recombination from gene sequences. *Genetics* **160**(3):

17 1231-1241.

18

19 McVean GA, Myers SR, Hunt S, Deloukas P, Bentley DR, Donnelly P (2004).

20 The fine-scale structure of recombination rate variation in the human genome.

21 *Science* **304**(5670): 581-584.

1

2 Menotti-Raymond M, David VA, Lyons LA, Schaffer AA, Tomlin JF, Hutton

3 MK *et al* (1999). A genetic linkage map of microsatellites in the domestic cat

4 (*Felis catus*). *Genomics* **57**(1): 9-23.

5

6 Menotti-Raymond M, David VA, Schaffer AA, Tomlin JF, Eizirik E, Phillip C *et*

7 *al* (2009). An autosomal genetic linkage map of the domestic cat, *Felis silvestris*

8 *catus*. *Genomics* **93**(4): 305-313.

9

10 Munoz-Fuentes V, Di Rienzo A, Vila C (2011). Prdm9, a major determinant of

11 meiotic recombination hotspots, is not functional in dogs and their wild relatives,

12 wolves and coyotes. *Plos One* **6**(11): e25498.

13

14 Myers S, Bottolo L, Freeman C, McVean G, Donnelly P (2005). A fine-scale map

15 of recombination rates and hotspots across the human genome. *Science*

16 **310**(5746): 321-324.

17

18 Myers S, Bowden R, Tumian A, Bontrop RE, Freeman C, MacFie TS *et al*

19 (2010). Drive against hotspot motifs in primates implicates the PRDM9 gene in

20 meiotic recombination. *Science* **327**(5967): 876-879.

21

1 Myers S, Freeman C, Auton A, Donnelly P, McVean G (2008). A common  
2 sequence motif associated with recombination hot spots and genome instability in  
3 humans. *Nat Genet* **40**(9): 1124-1129.  
4  
5 Paigen K, Petkov P (2010). Mammalian recombination hot spots: properties,  
6 control and evolution. *Nat Rev Genet* **11**(3): 221-233.  
7  
8 Paradis E, Claude J, Strimmer K (2004). APE: Analyses of Phylogenetics and  
9 Evolution in R language. *Bioinformatics* **20**(2): 289-290.  
10  
11 Steinmetz M, Minard K, Horvath S, McNicholas J, Srelinger J, Wake C *et al*  
12 (1982). A molecular map of the immune response region from the major  
13 histocompatibility complex of the mouse. *Nature* **300**(5887): 35-42.  
14  
15 Stephens M, Donnelly P (2003). A comparison of bayesian methods for haplotype  
16 reconstruction from population genotype data. *Am J Hum Genet* **73**(5): 1162-  
17 1169.  
18  
19 Tortereau F, Servin B, Frantz L, Megens HJ, Milan D, Rohrer G *et al* (2012). A  
20 high density recombination map of the pig reveals a correlation between sex-  
21 specific recombination and GC content. *BMC Genomics* **13**: 586.

1

2 Wang Y, Rannala B (2008). Bayesian inference of fine-scale recombination rates

3 using population genomic data. *Philos Trans R Soc Lond B Biol Sci* **363**(1512):

4 3921-3930.

5

6 Wang Y, Rannala B (2009). Population genomic inference of recombination rates

7 and hotspots. *Proc Natl Acad Sci U S A* **106**(15): 6215-6219.

8

9 Wu ZK, Getun IV, Bois PR (2010). Anatomy of mouse recombination hot spots.

10 *Nucleic Acids Res* **38**(7): 2346-2354.

11

12 Zheng J, Khil PP, Camerini-Otero RD, Przytycka TM (2010). Detecting sequence

13 polymorphisms associated with meiotic recombination hotspots in the human

14 genome. *Genome Biol* **11**(10): R103.

15

16

17

# 1 **Figure legends**

2 **Figure 1** Recombination overview of chromosomes A2, D1, and E2 regions. (a-  
3 c) Posterior recombination rates (population size scaled) across chromosomes A2,  
4 D1, and E2 regions, respectively. Solid line shows the whole recombination rates,  
5 while the dashed line shows the background recombination rates. (d-f) Posterior  
6 probability of hotspots along chromosomes A2, D1, and E2 regions, respectively.  
7 (g-i) Bayes factor of hotspots for chromosomes A2, D1, and E2 regions,  
8 respectively. Horizontal dotted line corresponds to Bayes factor of 100 in a log<sub>10</sub>  
9 scale. Position and distribution of SNPs included in the recombination analysis  
10 are at the bottom.

11  
12 **Figure 2** Overview of variation and repeat elements in the cat chromosomal  
13 regions studied. a) Variation and repeat element ( $n = 22$ ) within four hotspots.  
14 All elements within the hotspots are shown at the tips of the outer circle. b)  
15 Variation and repeat element ( $n = 16,798$ ) within “neutral” bins. Elements  
16 present >100 within the warm-spots are shown at the tips of the outer circle. The  
17 inner circle represents the elements’ classes, middle circle represents elements’  
18 families, and outer circle represent the individual elements.

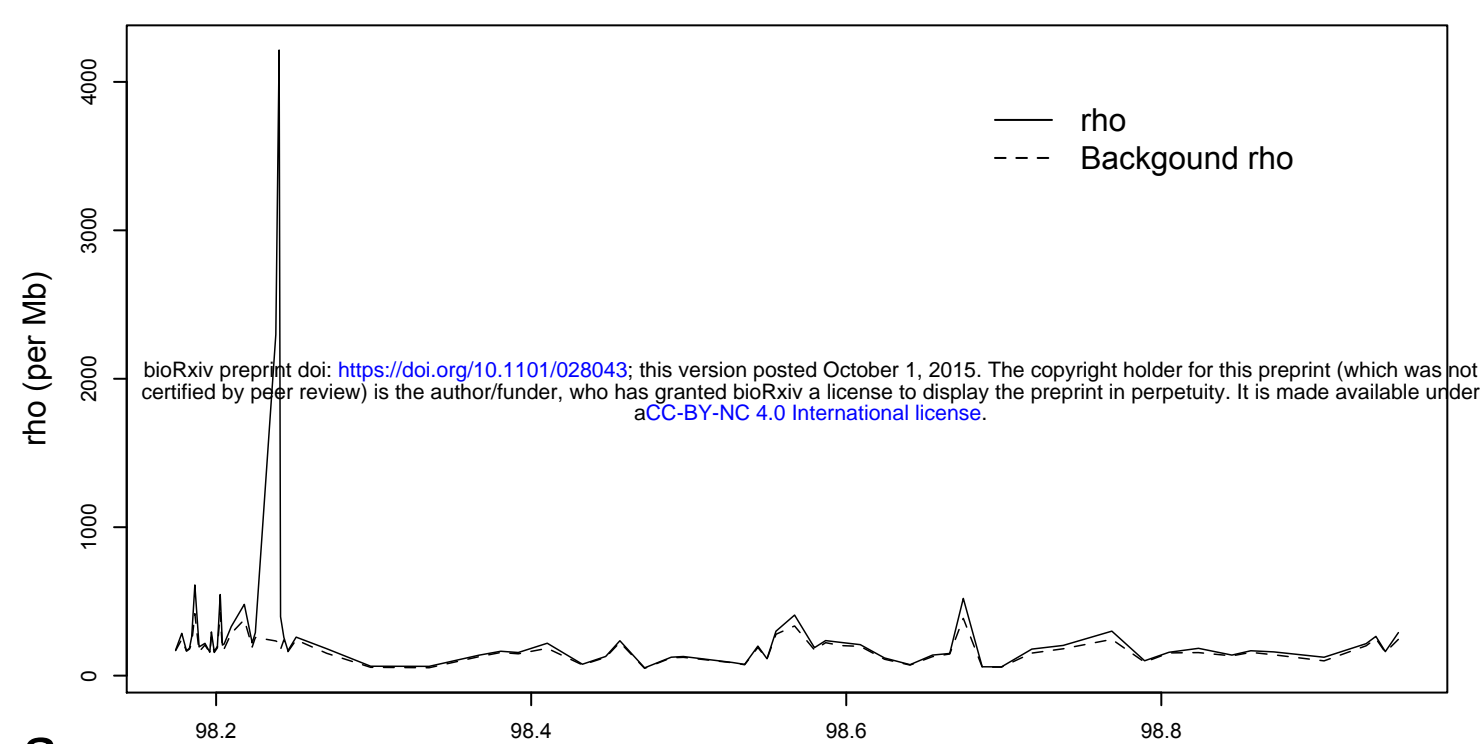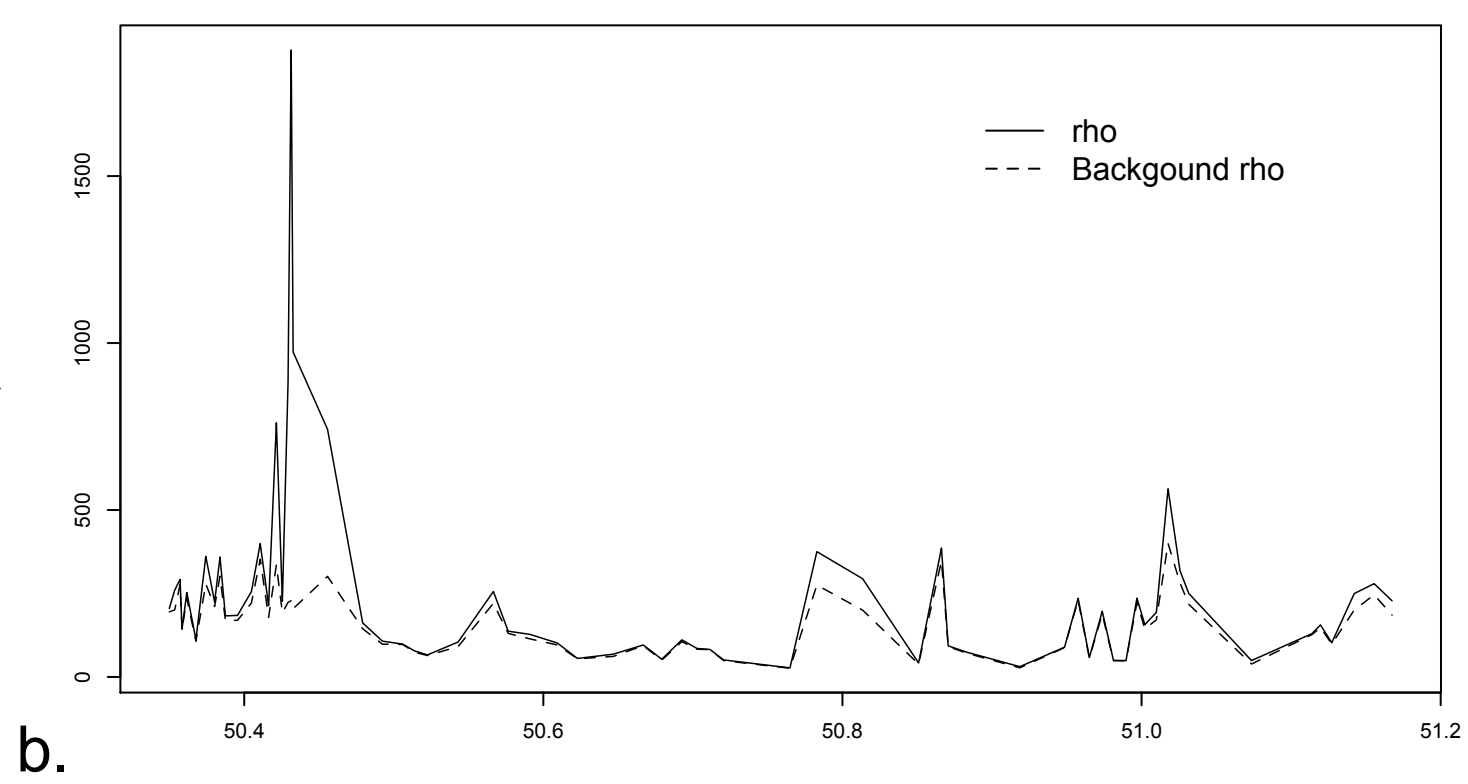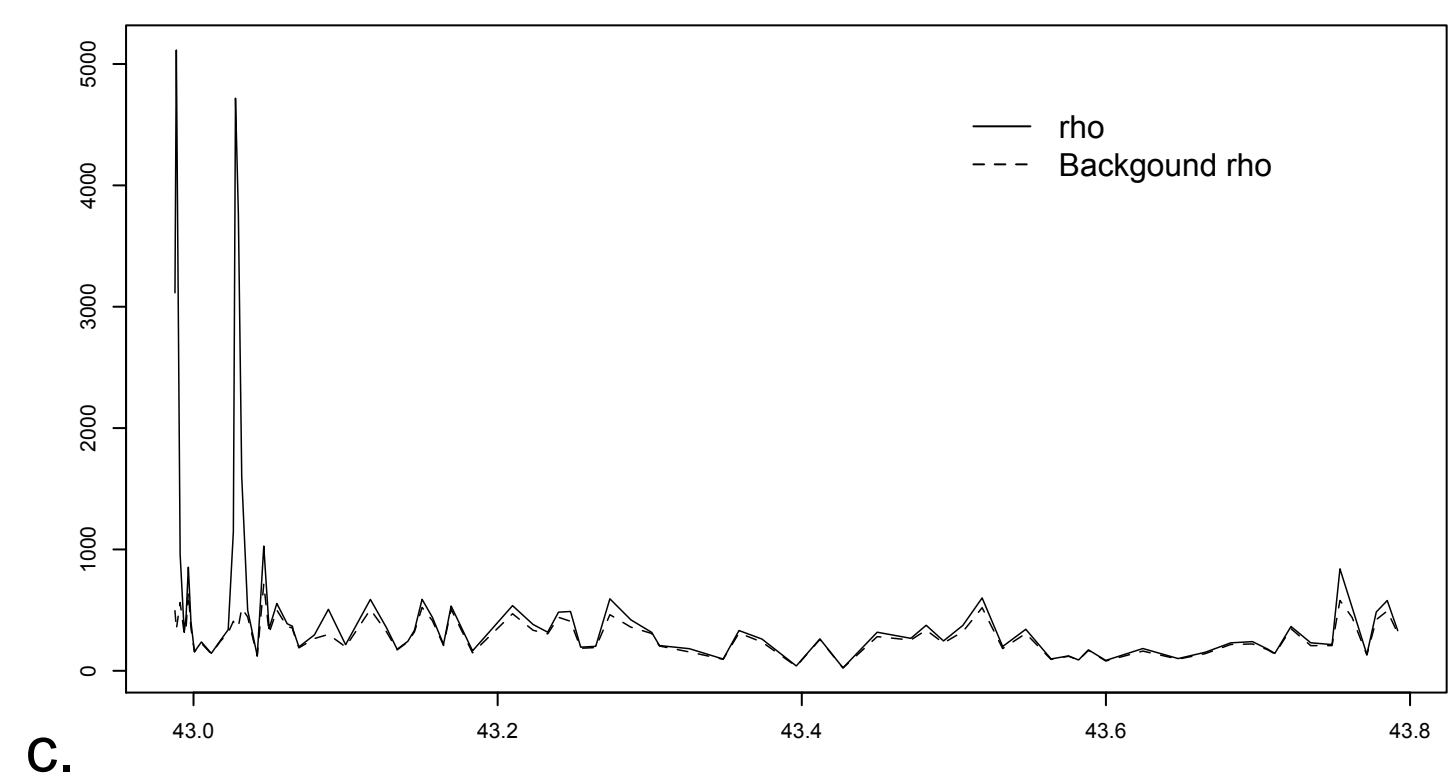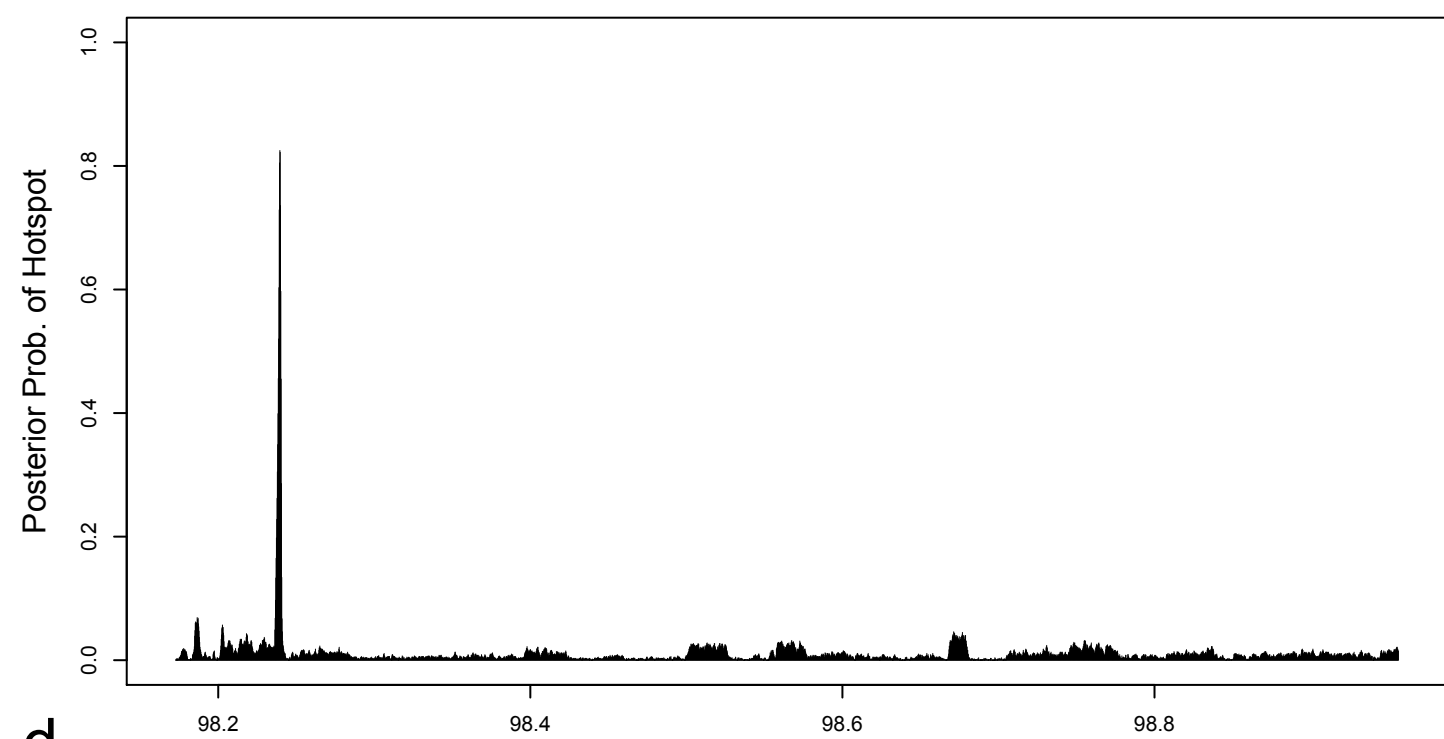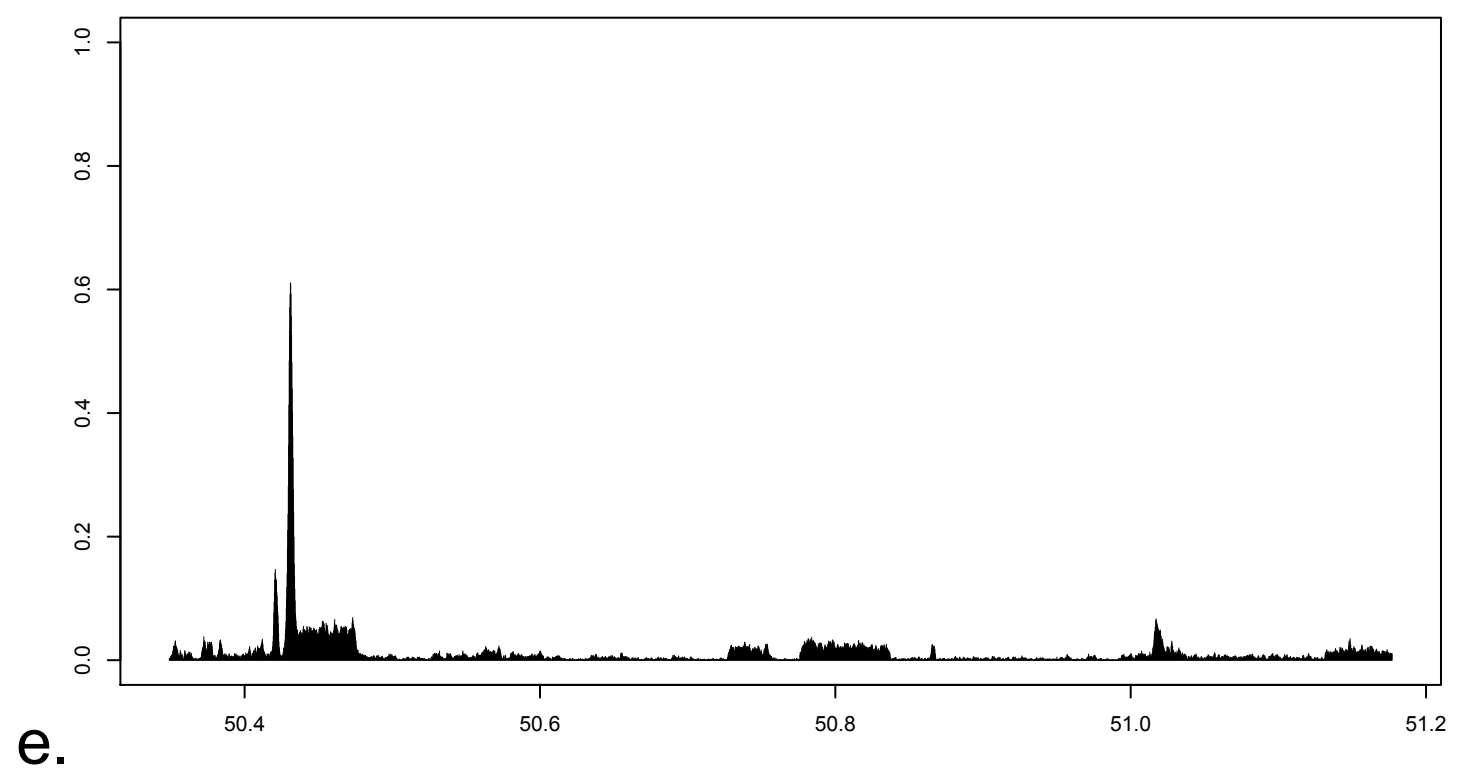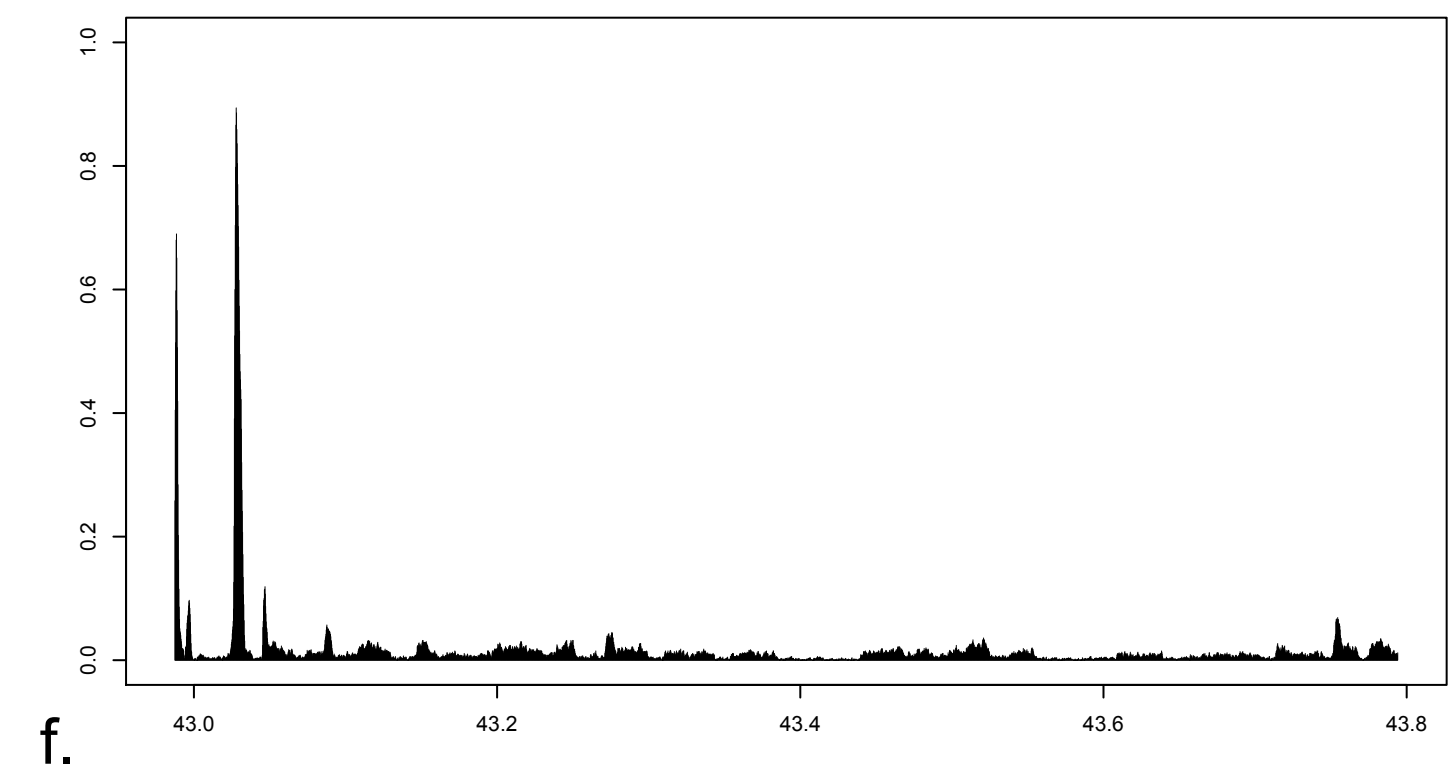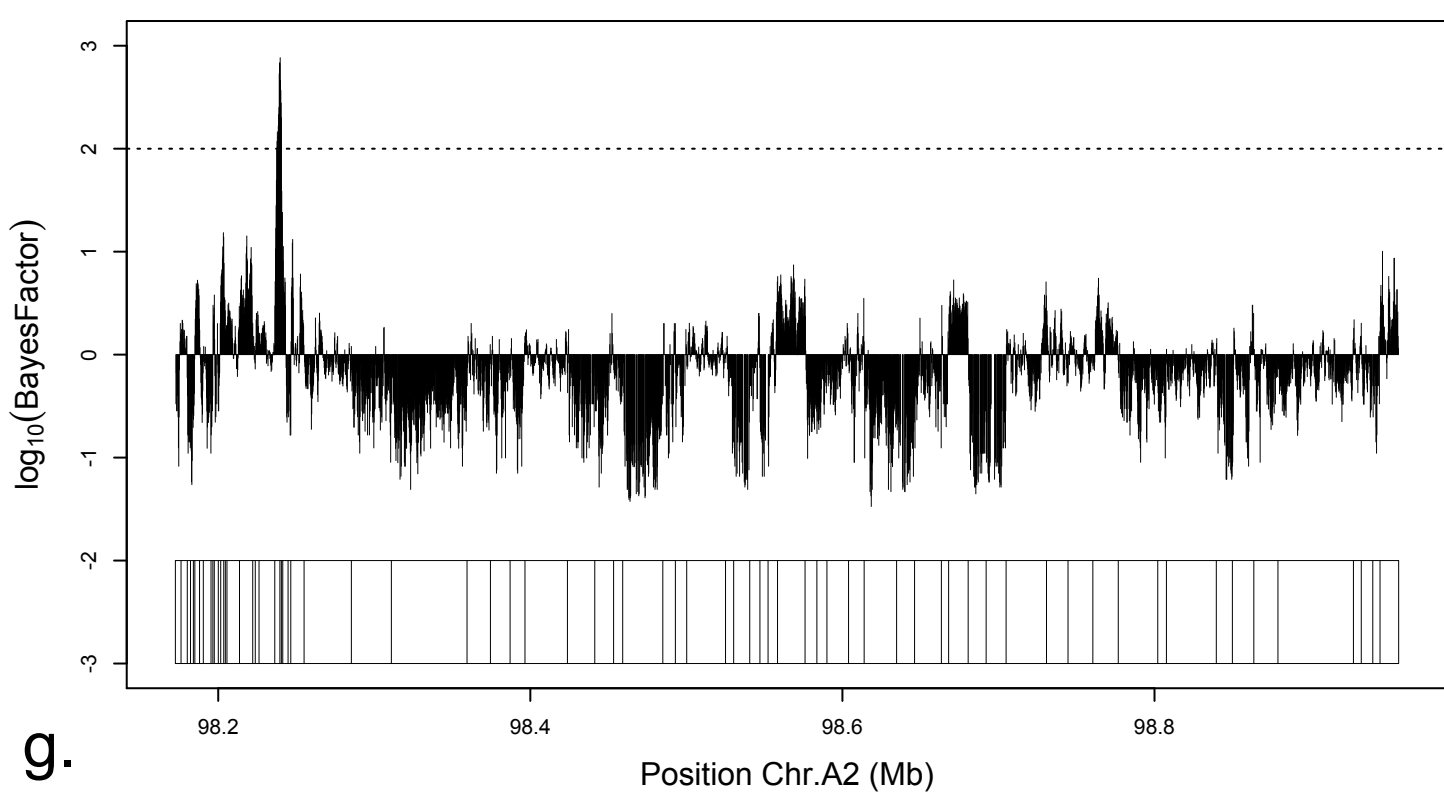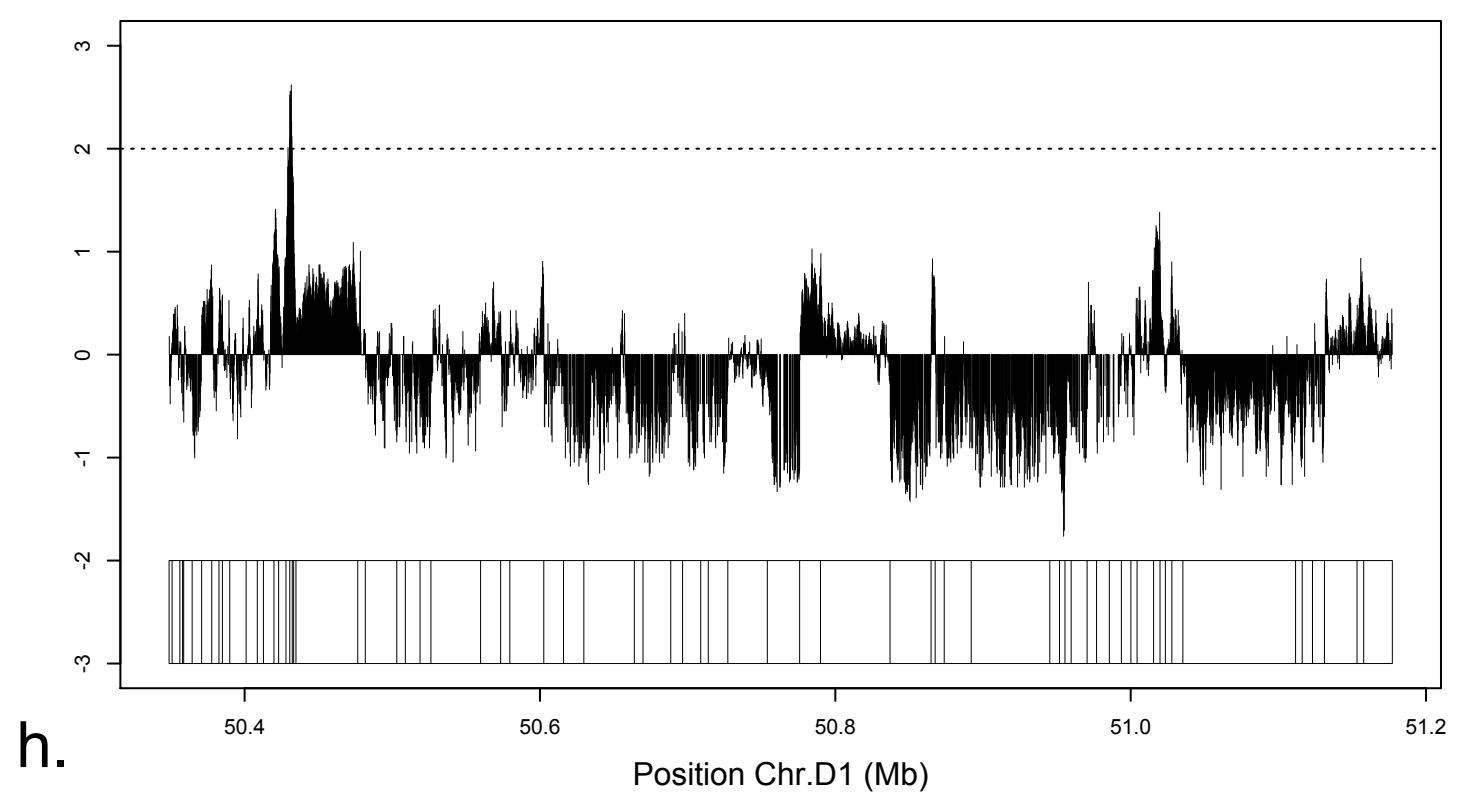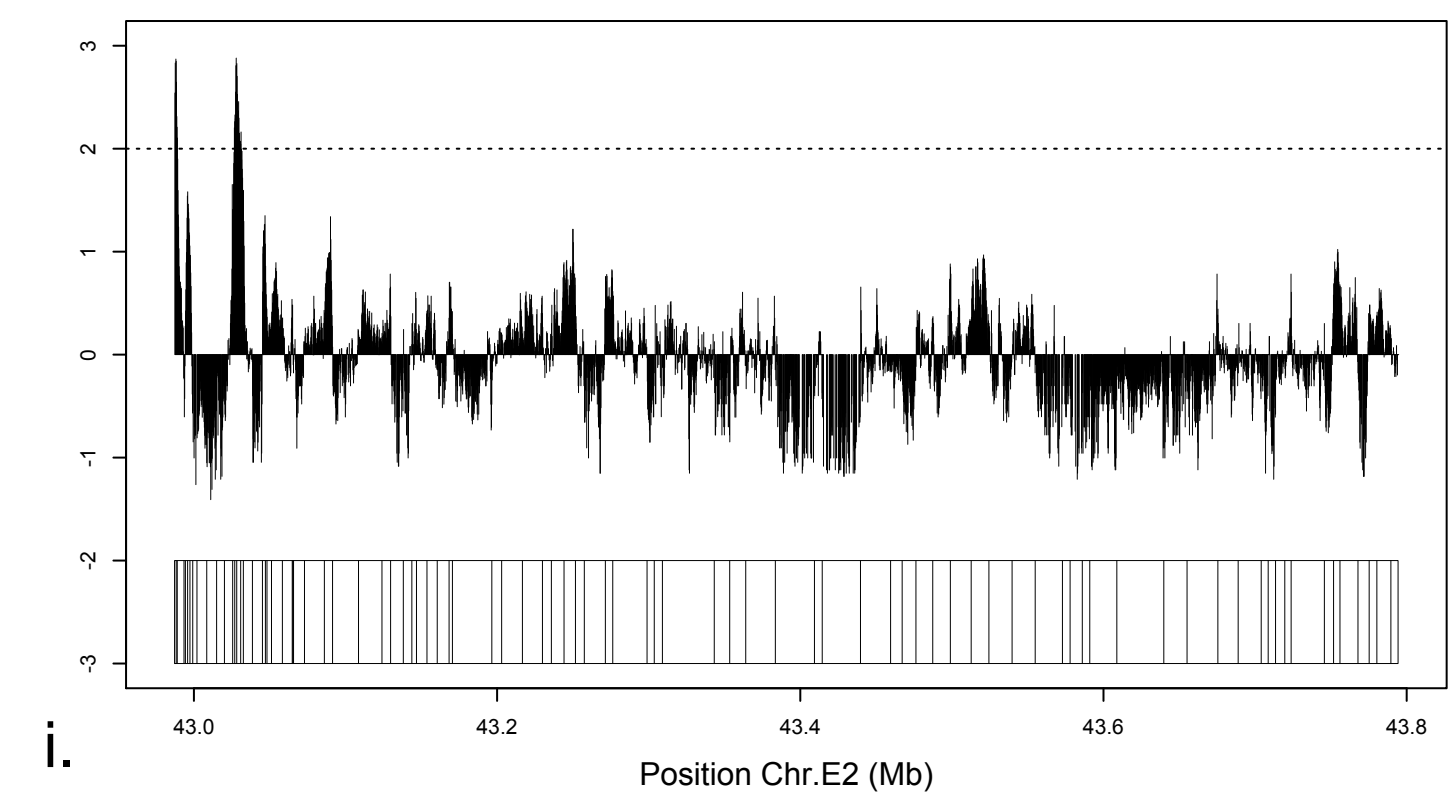

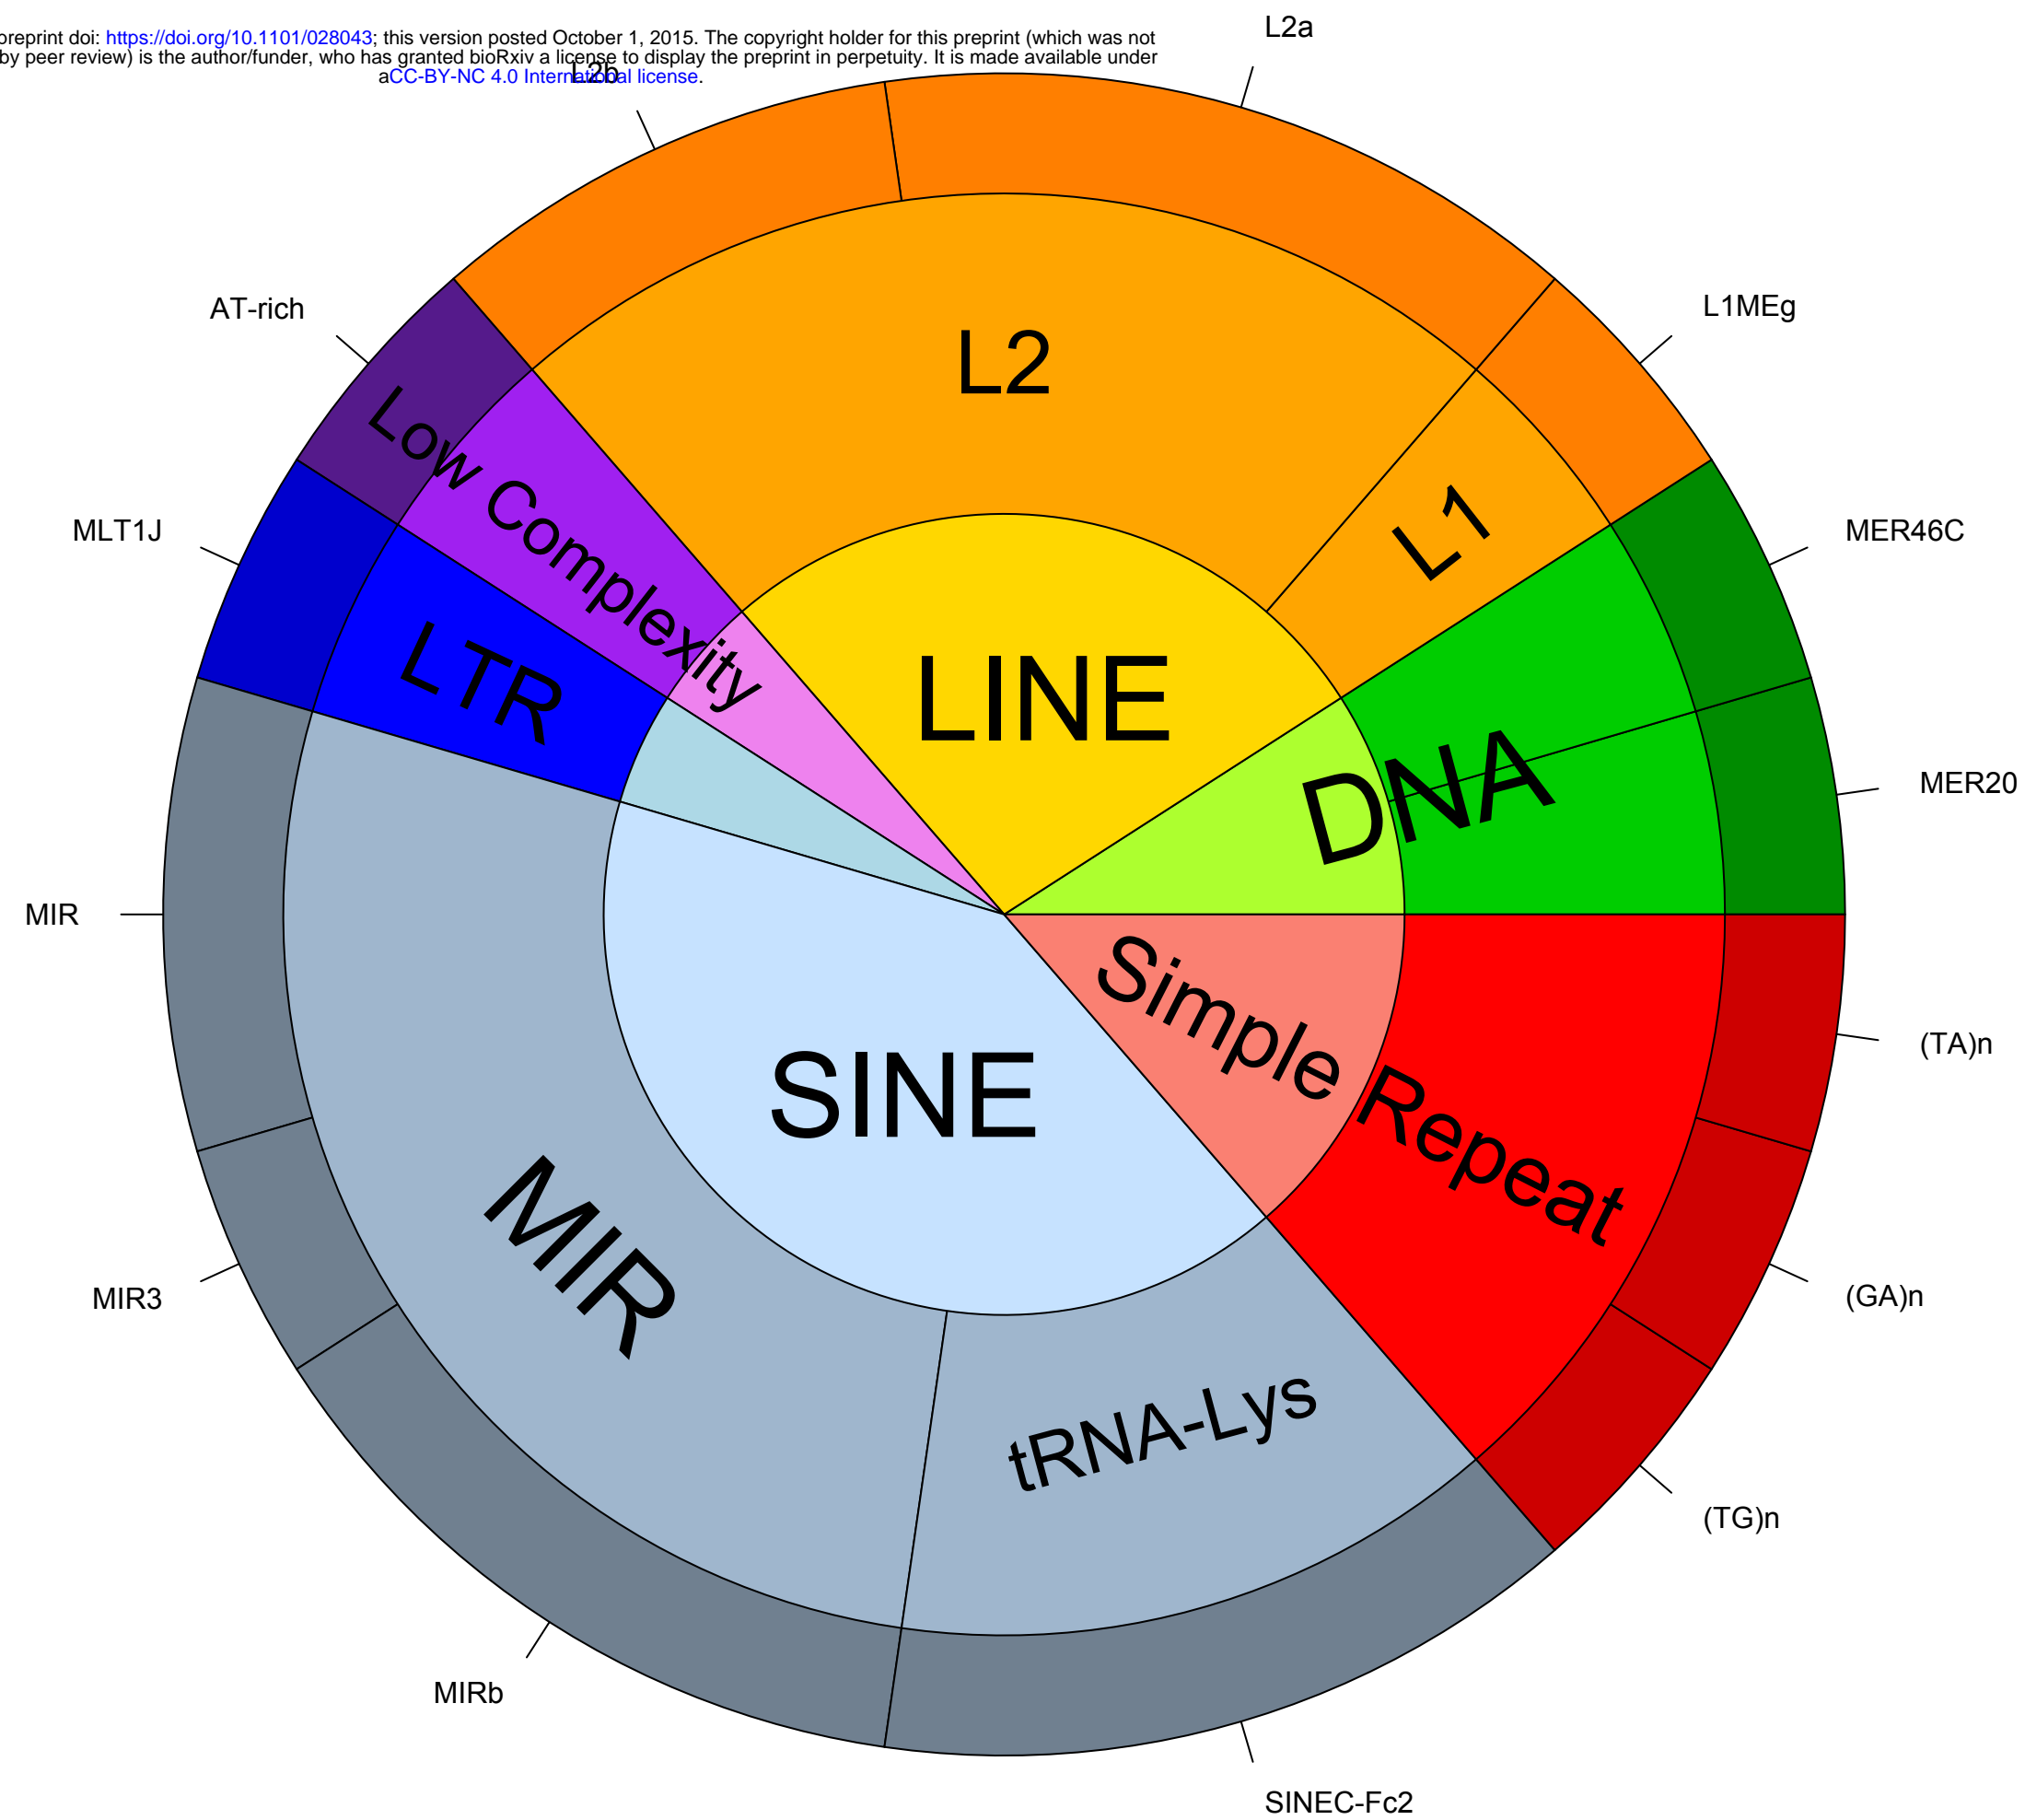

a.

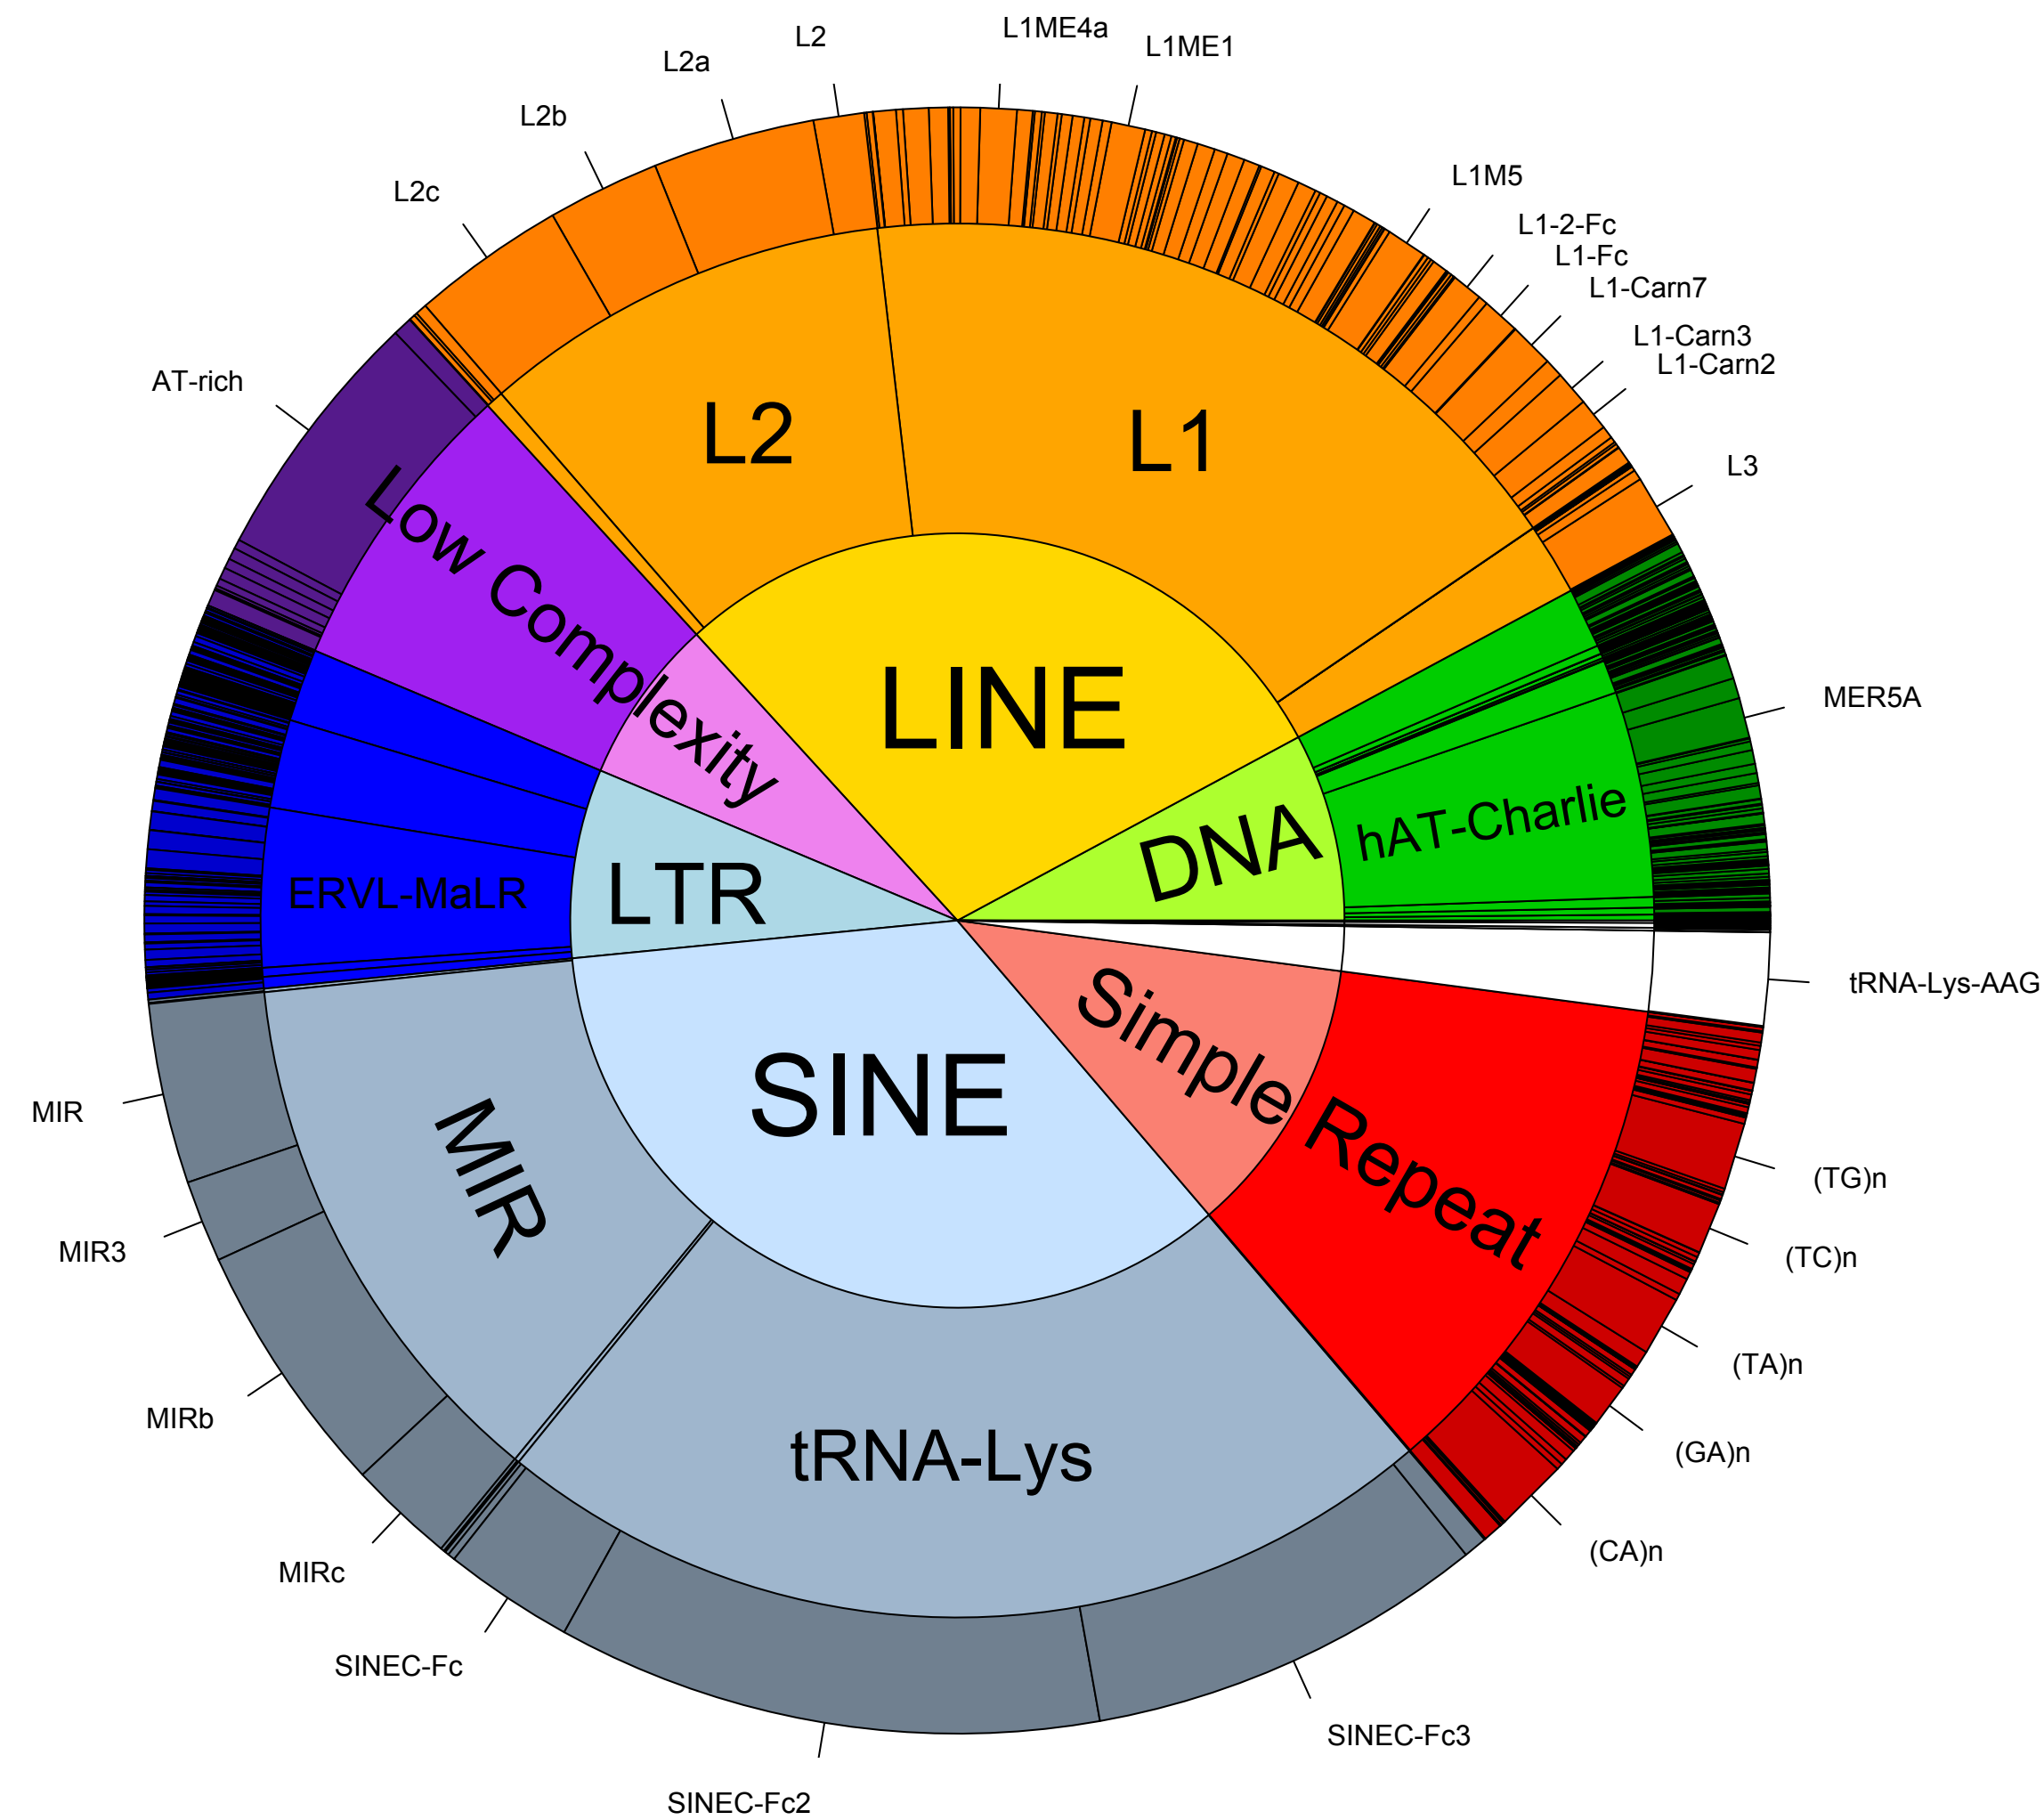

**b.**
